# Supplementary material for: pH-controlled growth of ultrathin iron vanadium oxide (FeV3O8) nanoplatelets with high visible-light photo-catalytic activity
Source: Royal Society of Chemistry journal article supplement (doi:10.1039/c4ta03161j), 2014-07-16
Supplement: c4ta03161j1.pdf [file c4ta03161j1.pdf]

## Electronic Supplementary Information

# pH-Controlled growth of ultrathin iron vanadium oxide (FeV<sub>3</sub>O<sub>8</sub>) nanoplatelets with high visible-light photo-catalytic activity

Lin-fei Zhang,<sup>‡,a,b</sup> Juan Zhou,<sup>‡,a</sup> and Chun-yang Zhang<sup>\*,a</sup>

<sup>a</sup> Single-Molecule Detection and Imaging Laboratory, Shenzhen Institutes of Advanced Technology, Chinese Academy of Sciences, Shenzhen 518055, China

<sup>b</sup> Department of Materials Science and Engineering, South University of Science and Technology of China, Shenzhen, Guangdong 518055, China

<sup>‡</sup> These authors contributed equally.

\* To whom correspondence should be addressed. E-mail: zhangcy@siat.ac.cn

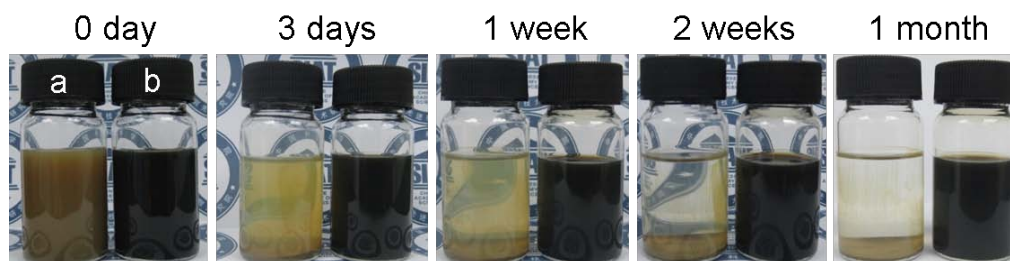

**Fig. S1** Stability of ultrathin FeV<sub>3</sub>O<sub>8</sub> nanoplatelets as a function of PVP. (a) The product synthesized in the absence of PVP gradually deposited. (b) The product prepared in the presence of PVP was stable for at least 1 month.

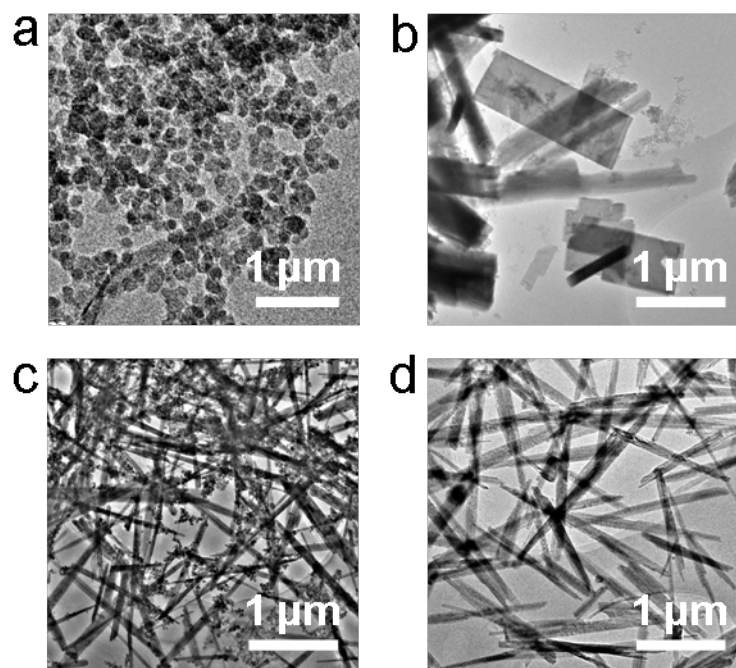

**Fig. S2** TEM images of the products synthesized at different pH values: (a) pH 3, (b) pH 5, (c) pH 2, and (d) pH 1.

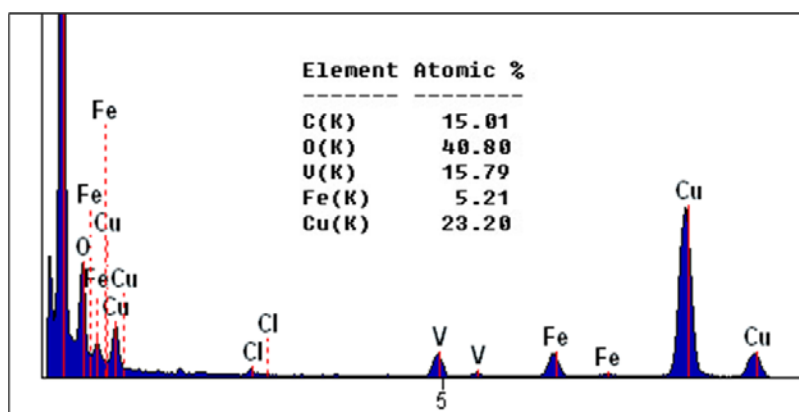

**Fig. S3** EDS analysis of ultrathin FeV<sub>3</sub>O<sub>8</sub> nanoplatelets

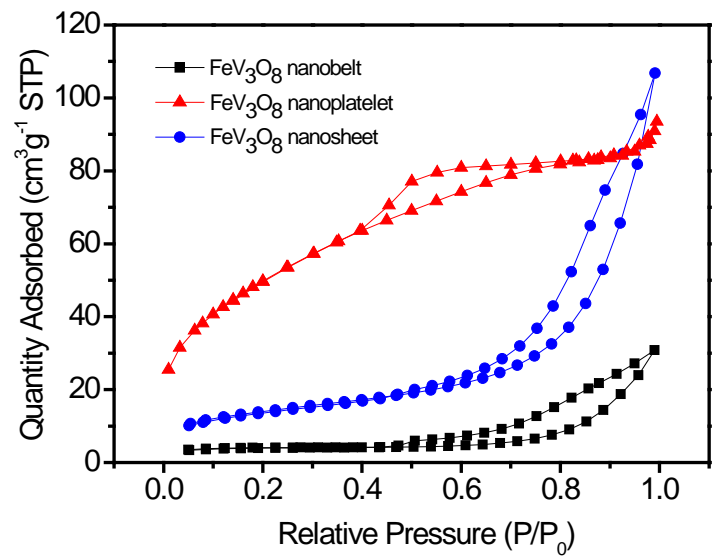

**Fig. S4** The N<sub>2</sub> adsorption and desorption isotherm of three samples: FeV<sub>3</sub>O<sub>8</sub> nanobelt (black square), FeV<sub>3</sub>O<sub>8</sub> nanoplatelet (red triangle) and FeV<sub>3</sub>O<sub>8</sub> nanosheet (blue circle).

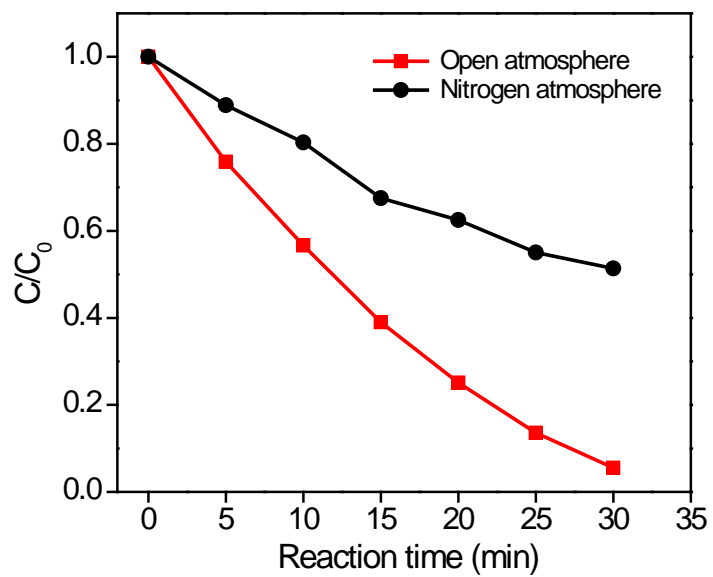

**Fig. S5** Photodegradation efficiencies of ultrathin  $\text{FeV}_3\text{O}_8$  nanoplatelets within 30-min visible-light irradiation under different reaction conditions: open atmosphere (red square) and nitrogen atmosphere (black circle).
